# Supplementary material for: Study of conformational transitions of i-motif DNA using time-resolved fluorescence and multivariate analysis methods
Source: PubMed Central journal article supplement (PMC6649798; doi:10.1093/nar/gkz522), 2019-06-14
Supplement: gkz522_supplemental_file.pdf [file gkz522_supplemental_file.pdf]

## Study of conformational transitions of i-Motif DNA by femtosecond fluorescence and MCR-ALS methods

Sanae Benabou<sup>1</sup>, Cyril Ruckebusch<sup>2</sup>, Michel Sliwa<sup>2</sup>, Anna Aviñó<sup>3</sup>, Ramon Eritja<sup>3</sup>, Raimundo Gargallo<sup>1</sup>, Anna de Juan<sup>1</sup>

<sup>1</sup> Department of Chemical Engineering and Analytical Chemistry, University of Barcelona, Martí i Franquès 1-11, E-08028 Barcelona, Spain

<sup>2</sup> Université de Lille Sciences et Technologies, LASIR CNRS, Cité Scientifique, 59655 Villeneuve d'Ascq, France.

<sup>3</sup> Institute for Advanced Chemistry of Catalonia (IQAC), CSIC, Networking Center on Bioengineering, Biomaterials and Nanomedicine (CIBER-BBN), Jordi Girona 18-26, E-08034 Barcelona, Spain

### Contents

| Section                                                                                                                       | Page |
|-------------------------------------------------------------------------------------------------------------------------------|------|
| Supplementary Figure 1. Chemical structure of Cy3 and Dabcyl                                                                  | 2    |
| Supplementary Figure 2. CD spectra                                                                                            | 2    |
| Supplementary Figure 3. Absorption and emission spectra                                                                       | 3    |
| Supplementary tables 1 and 2. Fluorescence decay fitting parameters                                                           | 5    |
| Supplementary Figure 4. Curve fitting analysis of pure traces                                                                 | 6    |
| Supplementary table 3. Comparison of fitting on pure resolved traces by MCR-ALS and on raw experimental decay curves (cftool) | 7    |

## Supplementary Figure 1. Chemical structure of the 5'-CY3 and 3'-DABCYL modifications

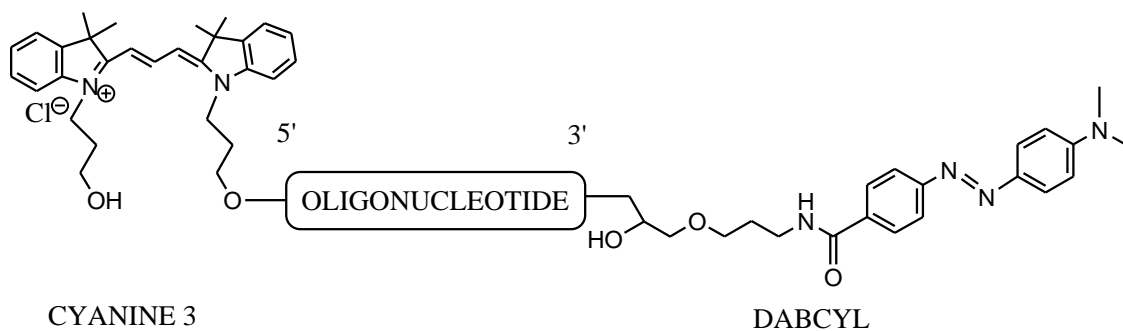

## Supplementary Figure 2. CD spectra

CD spectra of the unmodified (Blue) and 5'-Cy3, 3'-DABCYL-modified (red) TT, AA, nmyc and nmycM sequences at pH 4.

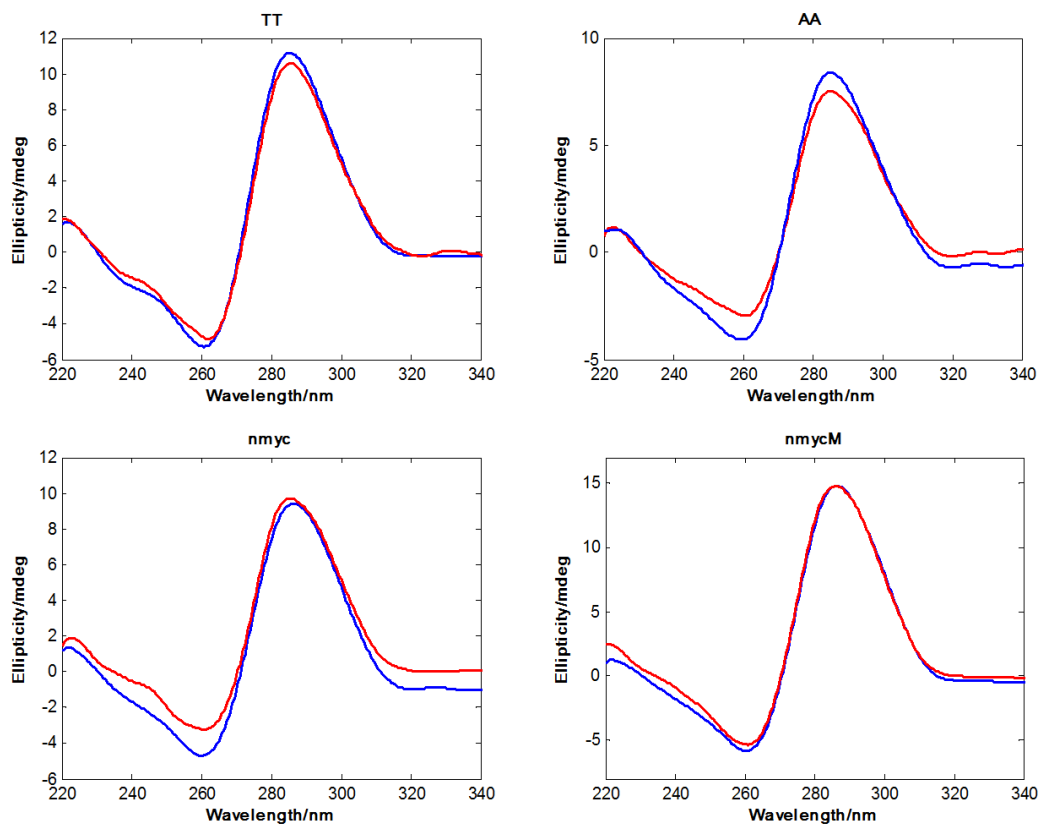

## Supplementary Figure 3. Absorption and emission spectra

Absorption and emission spectra at different pH for the fluorophore (Cy3) and all sequences studied. Conditions: 20mM phosphate buffer, 150mM KCl and 25°C

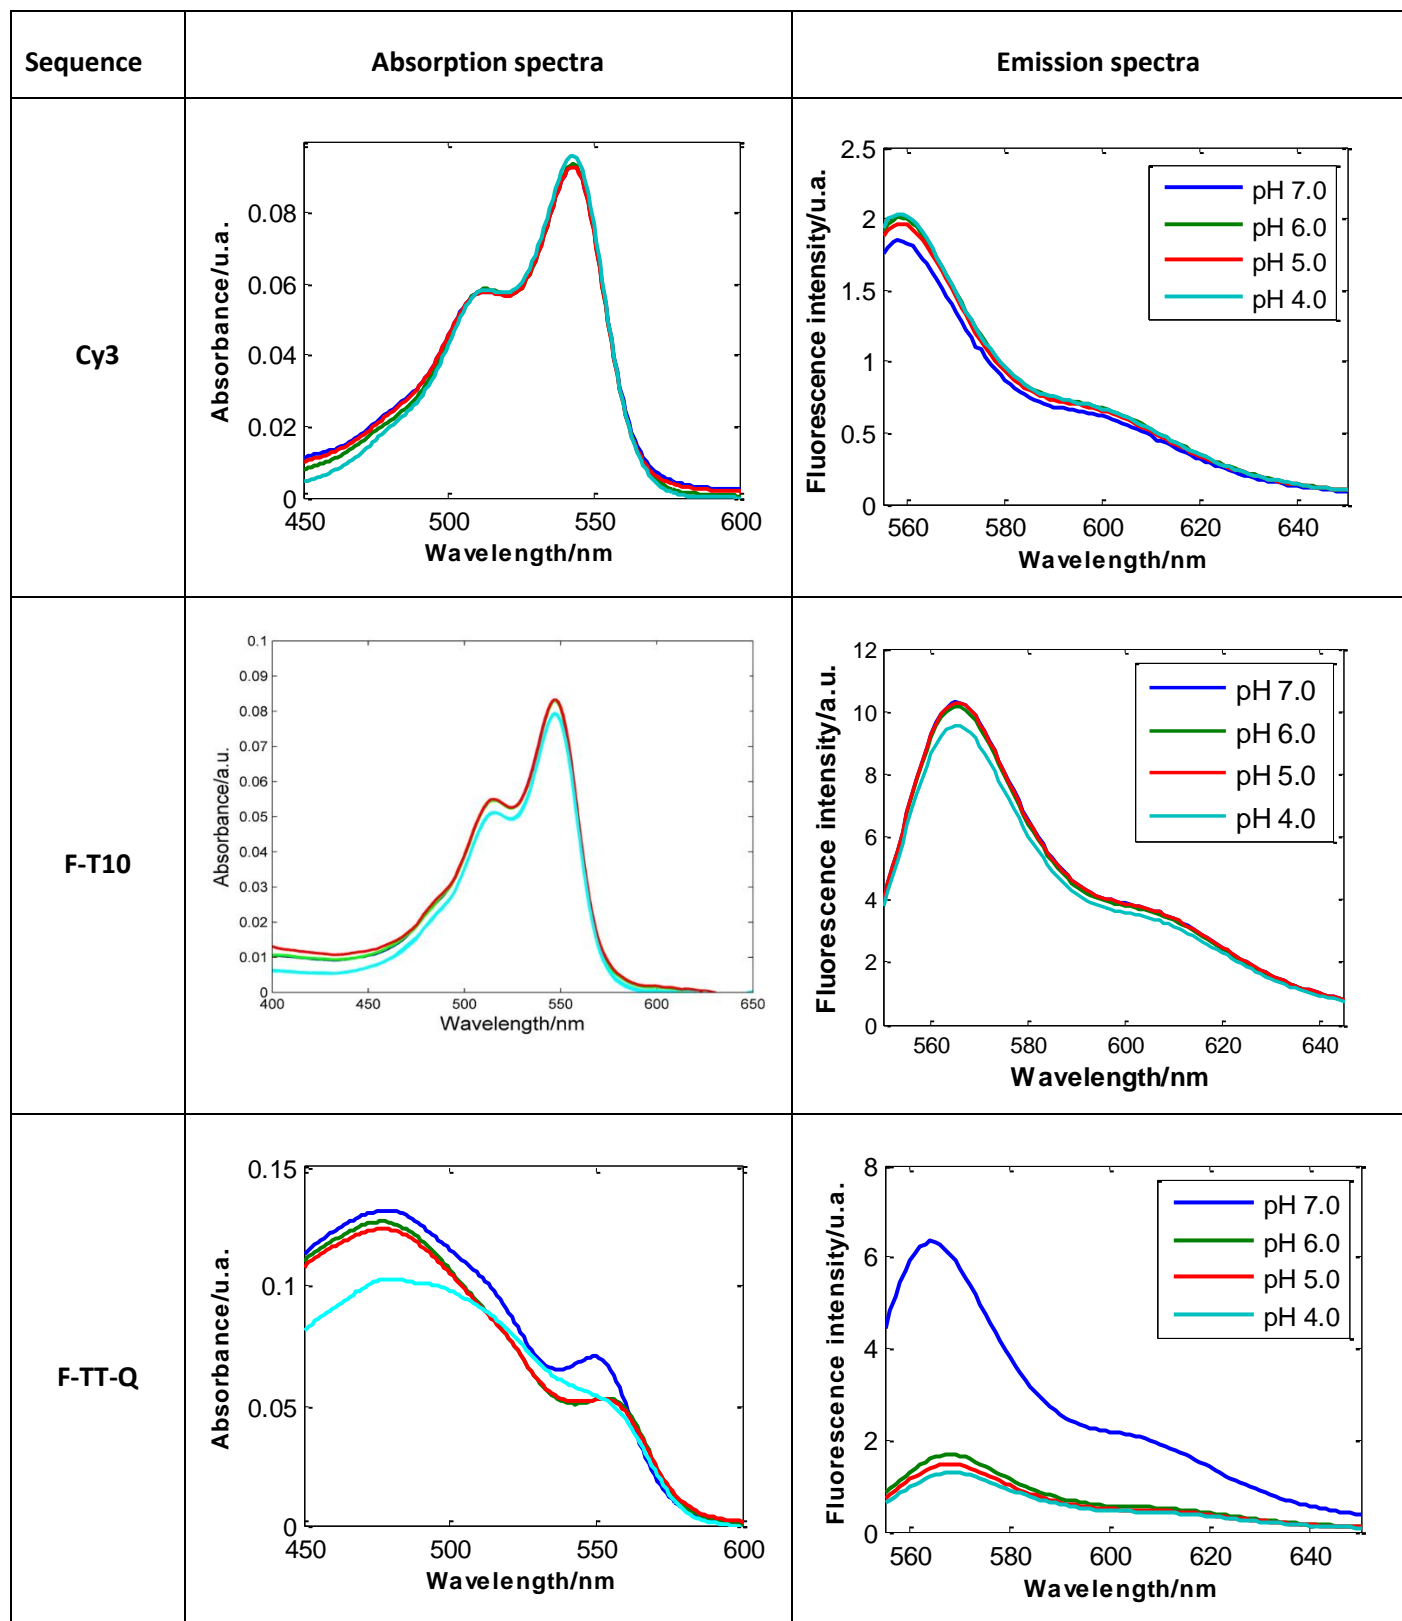

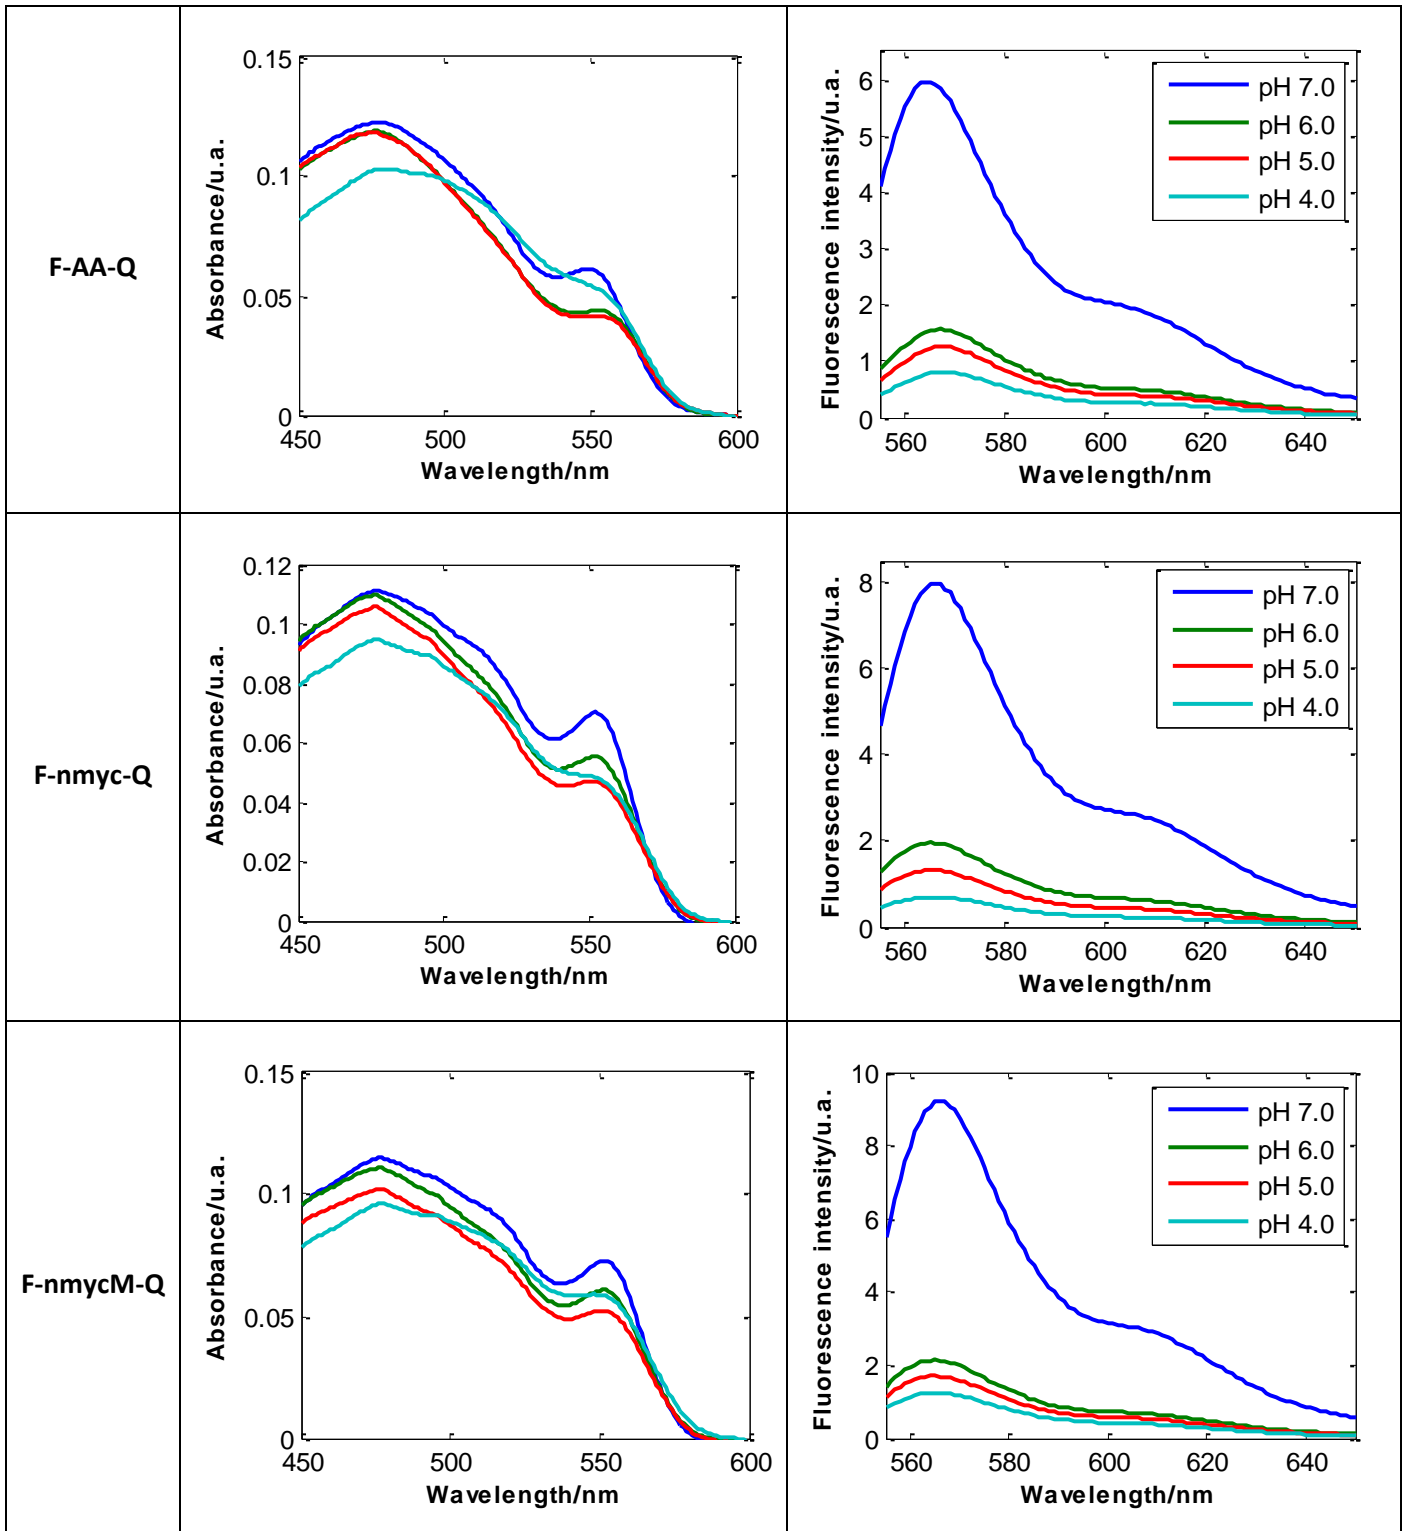

## Supplementary Tables 1 and 2. Fluorescence decay fitting parameters

Supplementary Table 1. Fluorescence decay fitting parameters of F-T<sub>10</sub>, F-AA-Q and F-TT-Q sequences, lifetime ( $\tau$ ) and the % of fractional amplitude. Experimental error : 20 ps. <sup>§</sup>: Number in parentheses is the first significant figure of error.

| Sample        | F-T <sub>10</sub>    |          |          |          | F-TT-Q   |         |         |         | F-AA-Q  |         |         |         |
|---------------|----------------------|----------|----------|----------|----------|---------|---------|---------|---------|---------|---------|---------|
|               | 7                    | 6        | 5        | 4        | 7        | 6       | 5       | 4       | 7       | 6       | 5       | 4       |
| $\tau_1$ (ns) | 1.88(8) <sup>§</sup> | 1.98(1)  | 2.01(1)  | 1.94 (9) | 2.35(7)  | 2.99(1) | 3.08(1) | 3.01(1) | 2.38(7) | 3.03(1) | 3.06(1) | 3.00(2) |
| % Amplitude   | 15.01                | 13.94    | 13.91    | 15.28    | 38.17    | 6.48    | 3.44    | 1.75    | 37.94   | 5.28    | 4.15    | 1.64    |
| $\tau_2$ (ns) | 0.71(3)              | 0.79(6)  | 0.81(7)  | 0.77(5)  | 1.11 (8) | 0.89(2) | 0.81(2) | 0.88(1) | 1.13(8) | 1.02(2) | 0.85(2) | 0.88(2) |
| % Amplitude   | 44.04                | 42.48    | 42.82    | 42.28    | 44.09    | 5.4     | 2.94    | 2.59    | 43.72   | 4.73    | 3.39    | 2.58    |
| $\tau_3$ (ns) | 0.19(3)              | 0.24 (6) | 0.25 (7) | 0.23 (5) | 0.35(2)  | 0.19(4) | 0.17(3) | 0.18(3) | 0.34(2) | 0.19(5) | 0.16(3) | 0.18(5) |
| % Amplitude   | 40.95                | 43.58    | 43.27    | 42.43    | 17.75    | 16.11   | 11.62   | 7.93    | 18.34   | 12.51   | 13.29   | 7.73    |
| $\tau_4$ (ns) |                      |          |          |          |          | 0.04(7) | 0.03(2) | 0.03(2) |         | 0.03(3) | 0.03(3) | 0.03(2) |
| % Amplitude   |                      |          |          |          |          | 72.01   | 82.00   | 87.73   |         | 77.48   | 79.18   | 88.05   |

Supplementary Table 2. Fluorescence decay fitting parameters of F-nmyc-Q and F-nmycM-Q sequences, life time ( $\tau$ ) and the % of fractional amplitude. Experimental error : 20 ps. <sup>§</sup>: Number in parentheses is the first significant figure of error.

| Sample        | F-nmyc-Q             |         |         |         | F-nmycM-Q |         |         |         |
|---------------|----------------------|---------|---------|---------|-----------|---------|---------|---------|
|               | 7                    | 6       | 5       | 4       | 7         | 6       | 5       | 4       |
| $\tau_1$ (ns) | 2.62(5) <sup>§</sup> | 2.68(1) | 2.64(1) | 2.75(1) | 2.52(5)   | 2.67(7) | 2.74(1) | 2.63(1) |
| % Amplitude   | 64.06                | 3.79    | 2.98    | 3.39    | 56.00     | 3.4     | 3.09    | 2.61    |
| $\tau_2$ (ns) | 1.12(1)              | 0.89(1) | 0.80(1) | 0.95(1) | 1.06(1)   | 0.89(1) | 0.97(2) | 0.81(1) |
| % Amplitude   | 29.39                | 3.13    | 2.79    | 3.86    | 32.63     | 2.73    | 2.93    | 2.92    |
| $\tau_3$ (ns) | 0.24(4)              | 0.17(4) | 0.16(3) | 0.19(4) | 0.27(3)   | 0.17(3) | 0.18(4) | 0.16(3) |
| % Amplitude   | 6.56                 | 8.81    | 9.69    | 12.1    | 11.38     | 9.85    | 11.23   | 10.96   |
| $\tau_4$ (ns) |                      | 0.03(3) | 0.03(2) | 0.03(4) |           | 0.03(2) | 0.03(4) | 0.03(2) |
| % Amplitude   |                      | 84.27   | 84.54   | 80.66   |           | 84.03   | 82.75   | 83.52   |

## Supplementary Figure 4. Curve fitting analysis

Fitting of the resolved pure decay traces obtained by MCR-ALS for the dominant conformations at the different pH values. Fitting tasks are done by using the curve fitting tool (cftool) of Matlab.

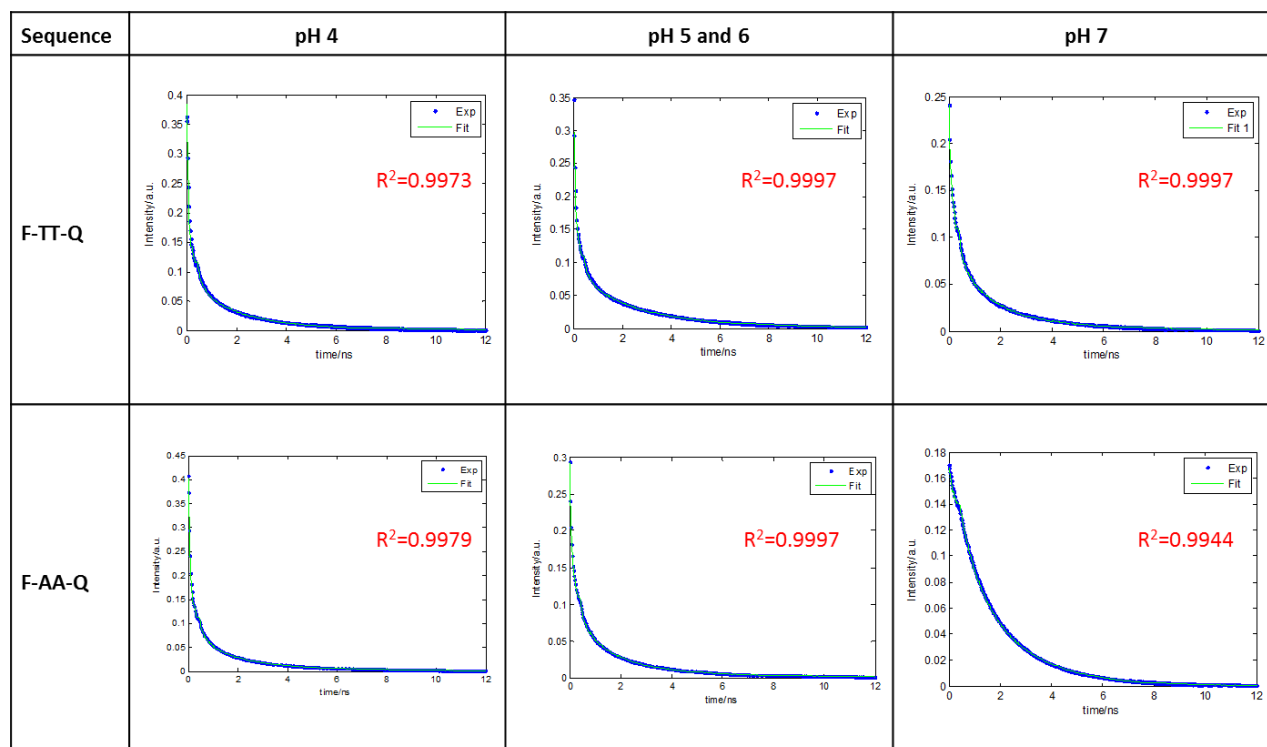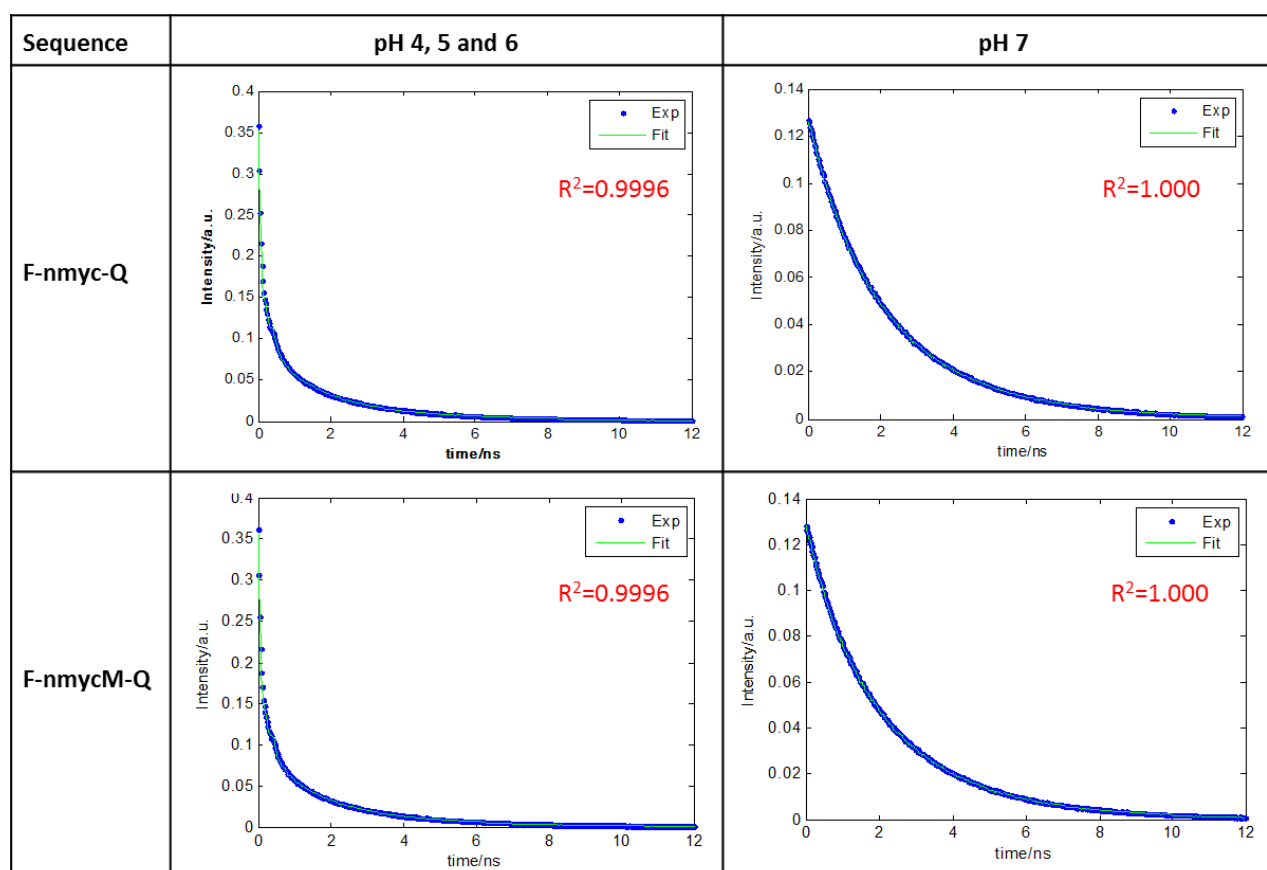

## Supplementary Table 3. Comparison of fitting on pure resolved traces by MCR-ALS and on raw experimental decay curves (cftool)

Fluorescence decay fitting parameters of F-TT-Q, F-AA-Q, F-nmyc-Q and F-nmycM-Q sequences, lifetime ( $\tau$ ) and the % of fractional amplitude. a) Fitting of experimental decay curves and b) pure resolved traces by MCR-ALS analysis by cftool. \*Pure traces that could be associated with this pH range. <sup>§</sup>: Number in parentheses is the first significant figure of error.

| <b>a) Fitting of raw experimental decay curves (cftool)</b> |                      |        |         |          |         |         |         |          |          |           |          |
|-------------------------------------------------------------|----------------------|--------|---------|----------|---------|---------|---------|----------|----------|-----------|----------|
| Sample                                                      | F-T10                | F-TT-Q |         |          | F-AA-Q  |         |         | F-nmyc-Q |          | F-nmycM-Q |          |
| pH                                                          | 7&6&5&4              | 7      | 6&5     | 4        | 7       | 6&5     | 4       | 7        | 6&5&4    | 7         | 6&5&4    |
| $\tau_1$ (ns)                                               | 1.79(4) <sup>§</sup> | 2.6(2) | 2.90(1) | 2.7(5)   | 2.7(1)  | 2.88(3) | 2.7(6)  | 2.67(2)  | 2.56(1)  | 2.6(4)    | 2.5(1)   |
| % Amplitude                                                 | 33                   | 33     | 23      | 18       | 32      | 26      | 18      | 70       | 25       | 70        | 22       |
| $\tau_2$ (ns)                                               | 0.610(1)             | 1.2(3) | 0.5(4)  | 0.53(1)  | 1.25(3) | 0.59(4) | 0.5(1)  | 1.16(3)  | 0.55(4)  | 1.06(1)   | 0.5(2)   |
| % Amplitude                                                 | 67                   | 67     | 29      | 33       | 68      | 27      | 33      | 30       | 28       | 30        | 27       |
| $\tau_3$ (ns)                                               |                      |        | 0.07(2) | 0.064(3) |         | 0.07(5) | 0.06(2) |          | 0.066(4) |           | 0.067(1) |
| % Amplitude                                                 |                      |        | 63      | 59       |         | 47      | 49      |          | 47       |           | 51       |

  

| <b>b) Fitting of pure resolved traces by MCR-ALS analysis (cftool)</b> |                      |          |          |         |          |          |          |          |           |          |  |
|------------------------------------------------------------------------|----------------------|----------|----------|---------|----------|----------|----------|----------|-----------|----------|--|
| Sample                                                                 | F-TT-Q               |          |          | F-AA-Q  |          |          | F-nmyc-Q |          | F-nmycM-Q |          |  |
| pH                                                                     | 7*                   | 6&5*     | 4*       | 7*      | 6&5*     | 4*       | 7*       | 6&5&4*   | 7*        | 6&5&4*   |  |
| $\tau_1$ (ns)                                                          | 2.8 (2) <sup>§</sup> | 3.08(3)  | 2.9(2)   | 2.63(3) | 2.66(3)  | 2.8(1)   | 2.69(2)  | 2.54(4)  | 2.61(2)   | 2.52(4)  |  |
| % Amplitude                                                            | 25                   | 20       | 14       | 48      | 18       | 12       | 68       | 18       | 69        | 18       |  |
| $\tau_2$ (ns)                                                          | 1.33(5)              | 0.45(1)  | 0.60(5)  | 0.46(1) | 0.469(9) | 0.56(4)  | 1.23(3)  | 0.49(2)  | 1.11(2)   | 0.48(2)  |  |
| % Amplitude                                                            | 75                   | 28       | 29       | 52      | 42       | 28       | 32       | 30       | 31        | 28       |  |
| $\tau_3$ (ns)                                                          |                      | 0.065(1) | 0.089(4) |         | 0.048(1) | 0.073(3) |          | 0.065(1) |           | 0.066(1) |  |
| % Amplitude                                                            |                      | 66       | 67       |         | 40       | 60       |          | 52       |           | 53       |  |
